# Supplementary material for: Bee Venom Induces Acute Inflammation through a H2O2-Mediated System That Utilizes Superoxide Dismutase
Source: MDPI journal article supplement (doi:10.3390/toxins14080558), 2022-08-17
Supplement: s1 [file s1]

**A**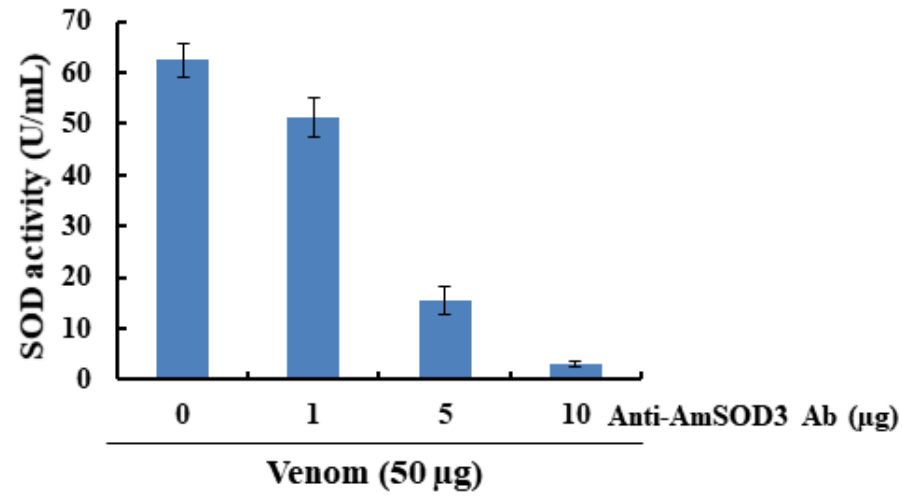**B**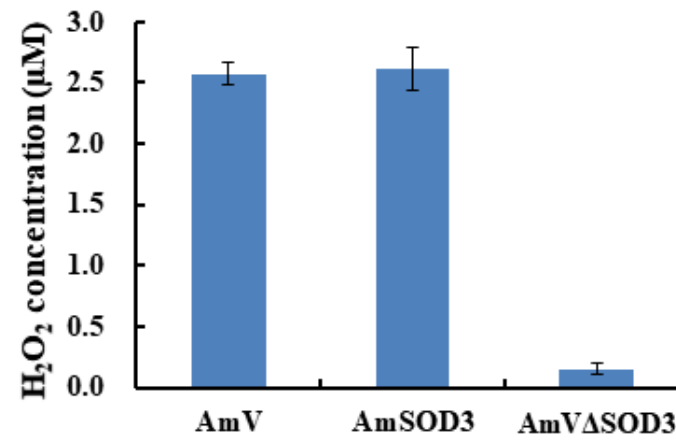

**Figure S2.** bvSOD3 functions in H<sub>2</sub>O<sub>2</sub> formation. **(A)** Preparation of bee venom in which SOD3 was blocked by immunoprecipitation with anti-AmSOD3 antibodies. *A. mellifera* bee venom (50 µg) was incubated with anti-AmSOD3 antibodies (1, 5, and 10 µg) at 37°C for 1 h, and the SOD activity was then measured. The data represent the mean ± SD ( $n = 3$ ). **(B)** In vitro H<sub>2</sub>O<sub>2</sub> production by native *A. mellifera* bee venom (AmV), bee venom with blocked SOD3 (AmVΔSOD3), or recombinant AmSOD3 (200 ng). The data represent the mean ± SD ( $n = 3$ ).

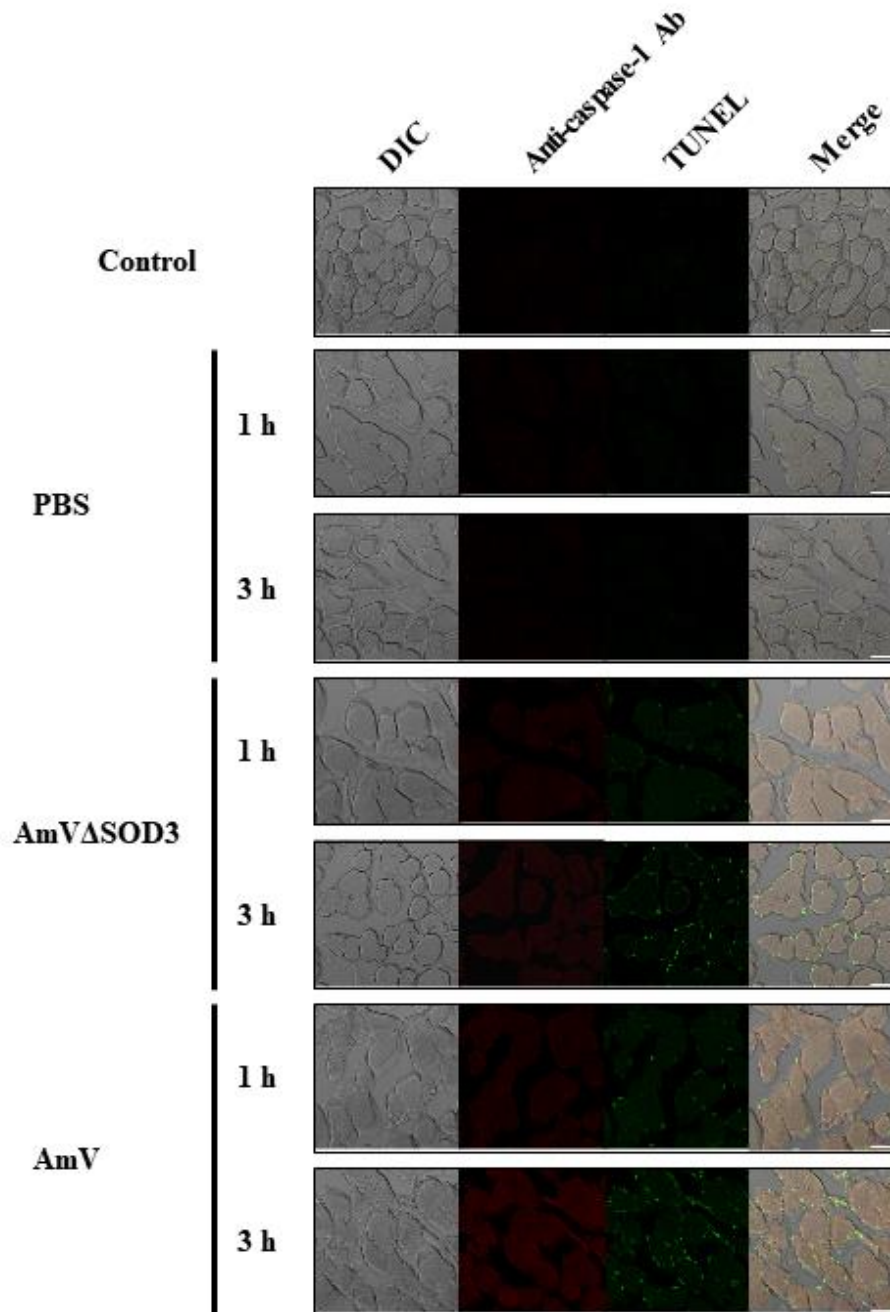

**Figure S3.** bvSOD3 increases the levels of caspase-1 and cell death. Representative immunofluorescence images showing caspase-1 expression (red) and bee venom-induced cell death (green) in mouse muscles from (Fig. 2A) at 1 or 3 h post injection. Scale bar, 40  $\mu$ m.

**A**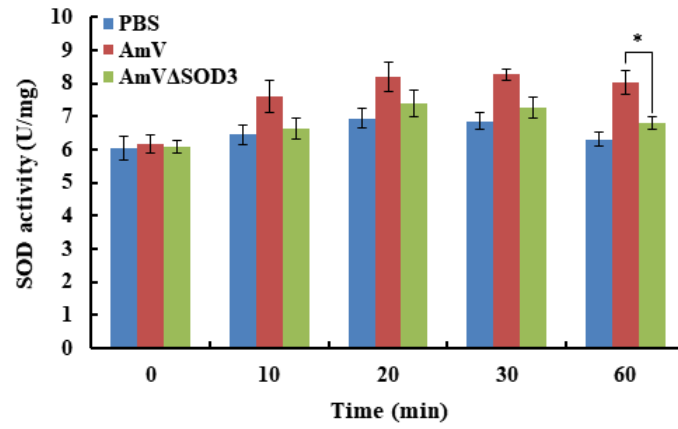**B**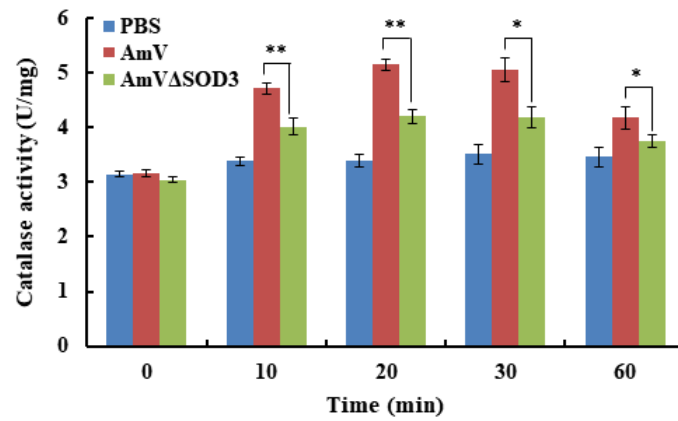**C**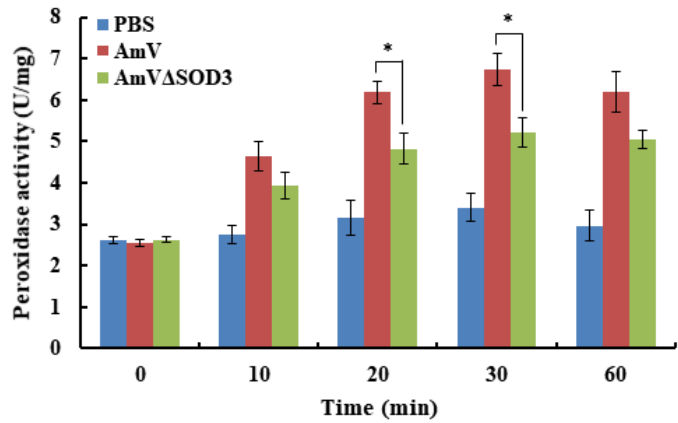

**Figure S4:** Antioxidant enzyme activity in bee venom-injected mouse muscles. SOD (A), catalase (B), and peroxidase (C) activities in mouse muscle samples analyzed in (Fig. 2A) ( $n = 5$ ). Data are the mean  $\pm$  SD; experiments were independently replicated three times. Independent  $t$ -test, \* $P < 0.05$ , \*\* $P < 0.01$ .

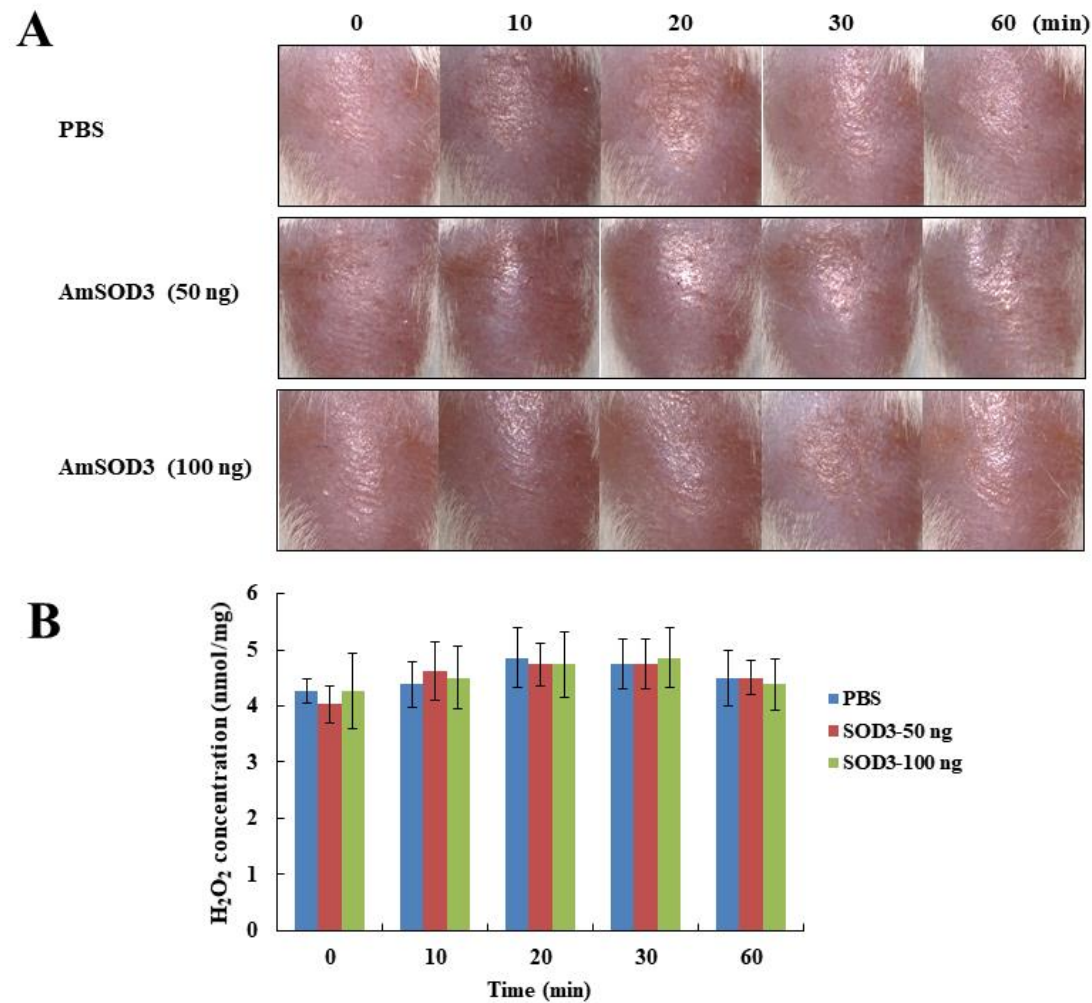

**Figure S5.** Mice injected with recombinant AmSOD3 alone do not exhibit an inflammatory response or H<sub>2</sub>O<sub>2</sub> production. **(A)** *In vivo* effects of recombinant AmSOD3 administration, determined by imaging of representative mice at 10, 20, 30, and 60 min post injection ( $n = 5$ ). PBS, injection control. **(B)** H<sub>2</sub>O<sub>2</sub> concentration in mouse muscles from (A). Data are the mean  $\pm$  SD; experiments were independently replicated three times.

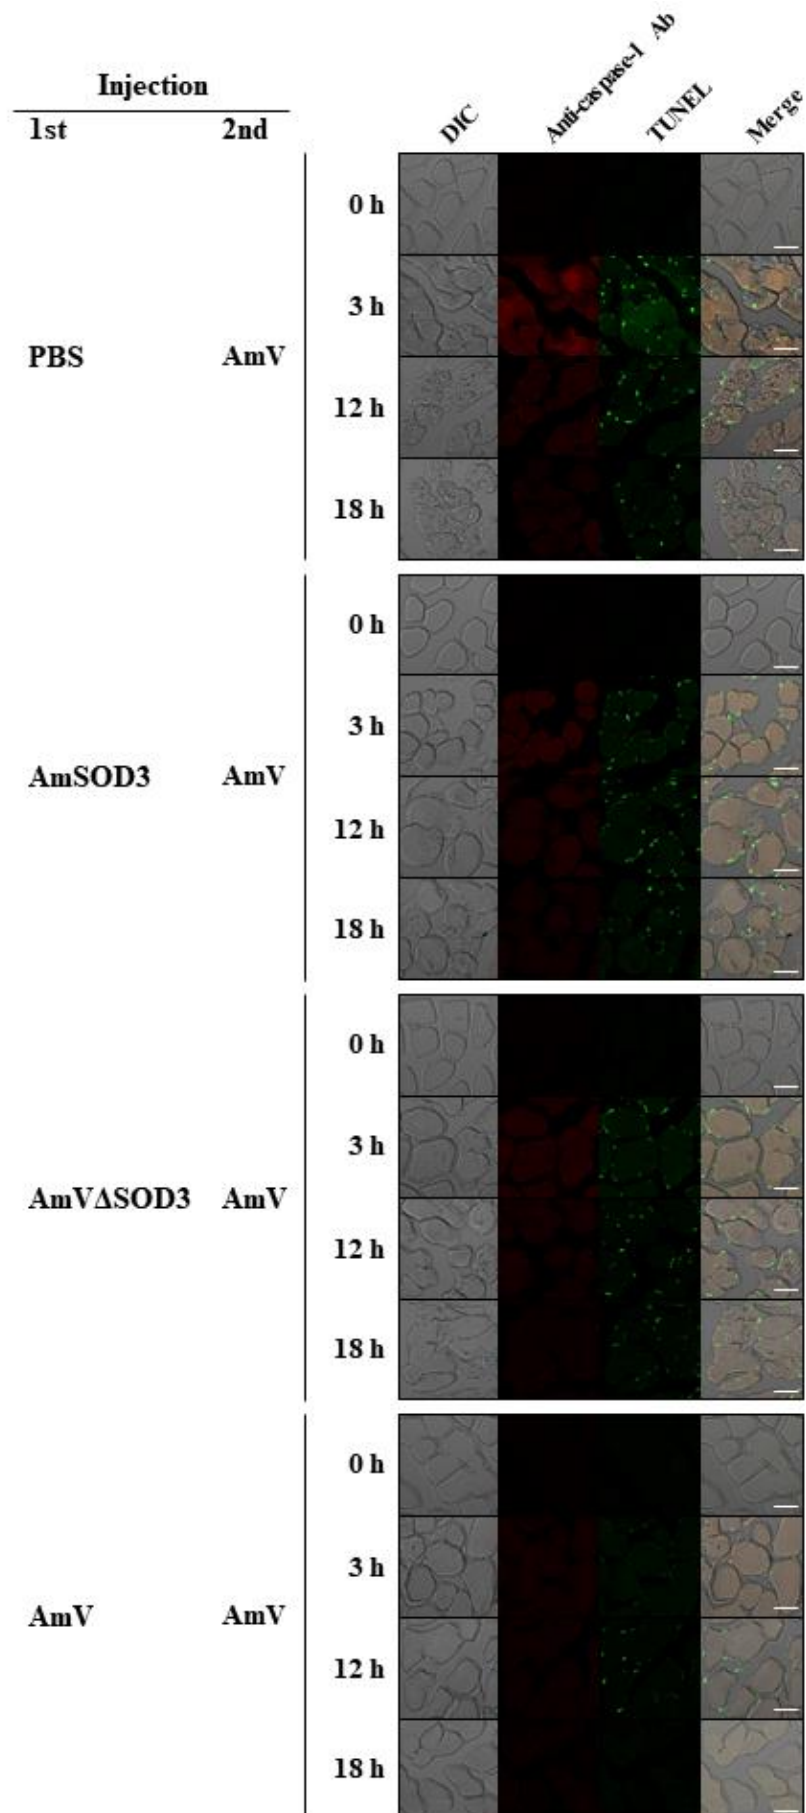

**Figure S6.** Immunization with bvSOD3 reduces the levels of caspase-1 and cell death. Representative immunofluorescence images showing caspase-1 expression (red) and bee venom-induced cell death (green) in mouse muscles from Figure 4C at 3, 12, or 18 h post challenge. Scale bar, 40  $\mu$ m.
